# Supplementary material for: Cytotoxic Potential of Alternaria tenuissima AUMC14342 Mycoendophyte Extract: A Study Combined with LC-MS/MS Metabolic Profiling and Molecular Docking Simulation
Source: MDPI journal article supplement (doi:10.3390/cimb44100344), 2022-10-20
Supplement: s1 [file s1]

# **Cytotoxic Potential of *Alternaria tenuissima* AUMC14342 Mycoendophyte Extract: A Study Combined with LC-MS/MS Metabolic Profiling and Molecular Docking Simulation**

**Amal A. Al Mousa <sup>1,\*</sup>, Mohamed E. Abouelela <sup>2,5\*</sup>, Abdallah M. A. Hassane <sup>3</sup>, Fatimah S. Al-Khattaf <sup>1</sup>, Ashraf A. Hatamleh <sup>1</sup>, Hadeel S. Alabdulhadi <sup>4</sup>, Noura D. Dahmash <sup>1</sup> and Nageh F. Abo-Dahab <sup>3</sup>**

\*Correspondence: aalmosa@ksu.edu.sa (A.A.); Tel.: +966505389419;  
m\_abouelela@azhar.edu.eg (M.A.) Tel.: +201123565130.

## Contents

| Figure                                                                                                            | Page |
|-------------------------------------------------------------------------------------------------------------------|------|
| <b>Figure S1.</b> Validation of docking protocol by complexed ligand redocking.                                   | 3    |
| <b>Figure S2.</b> MS <sup>2</sup> mass chromatogram of Cyclo-Ala-Pro-Diketopiperazine.                            | 4    |
| <b>Figure S3.</b> MS <sup>2</sup> mass chromatogram of (S)-alternariphent A.                                      | 4    |
| <b>Figure S4.</b> MS <sup>2</sup> mass chromatogram of Alternapyran.                                              | 5    |
| <b>Figure S5.</b> MS <sup>2</sup> mass chromatogram of Altenuene (4'-Epialtenuene).                               | 5    |
| <b>Figure S6.</b> MS <sup>2</sup> mass chromatogram of Solanapyrone G.                                            | 6    |
| <b>Figure S7.</b> MS <sup>2</sup> mass chromatogram of 4-methoxy-6-methyl-5-(3-oxobutyl)-2H-pyran-2-one.          | 6    |
| <b>Figure S8.</b> MS <sup>2</sup> mass chromatogram of Nacetyltyramine.                                           | 7    |
| <b>Figure S9.</b> MS <sup>2</sup> mass chromatogram of Versimide.                                                 | 7    |
| <b>Figure S10.</b> MS <sup>2</sup> mass chromatogram of 7-dehydrobrefeldin A.                                     | 8    |
| <b>Figure S11.</b> MS <sup>2</sup> mass chromatogram of Alternariol.                                              | 8    |
| <b>Figure S12.</b> MS <sup>2</sup> mass chromatogram of 5-butyl-4-methoxy-6-methyl-2H-pyran-2-one.                | 9    |
| <b>Figure S13.</b> MS <sup>2</sup> mass chromatogram of Altertenuol.                                              | 9    |
| <b>Figure S14.</b> MS <sup>2</sup> mass chromatogram of 3-O-demethylaltenuisol.                                   | 10   |
| <b>Figure S15.</b> MS <sup>2</sup> mass chromatogram of (-)-alternarlactam.                                       | 10   |
| <b>Figure S16.</b> MS <sup>2</sup> mass chromatogram of 2-(N-vinylacetamide)-4-hydroxymethyl-3-ene-butylolactone. | 11   |
| <b>Figure S17.</b> MS <sup>2</sup> mass chromatogram of Alternariol-9-methyl ether.                               | 11   |
| <b>Figure S18.</b> MS <sup>2</sup> mass chromatogram of Resveratrodehyde C.                                       | 12   |
| <b>Figure S19.</b> MS <sup>2</sup> mass chromatogram of Solanapyrone P.                                           | 12   |
| <b>Figure S20.</b> MS <sup>2</sup> mass chromatogram of Atransfusarin.                                            | 13   |
| <b>Figure S21.</b> MS <sup>2</sup> mass chromatogram of Alternatain A.                                            | 13   |

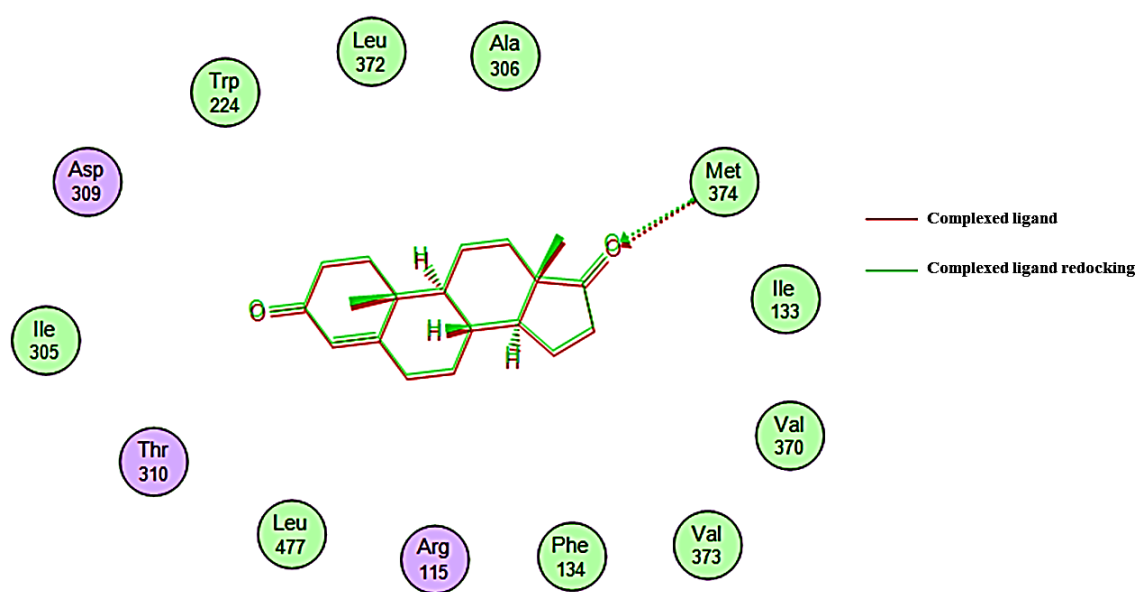

**Figure S1.** Validation of docking protocol by complexed ligand redocking.

Spectrum from AT -ve 1-6-2022 .wiff (sample 1) - AT -ve, Experiment 2, -EPI (50 - 800) from 4.485 min  
Precursor: 167.2 Da, Charge: 1

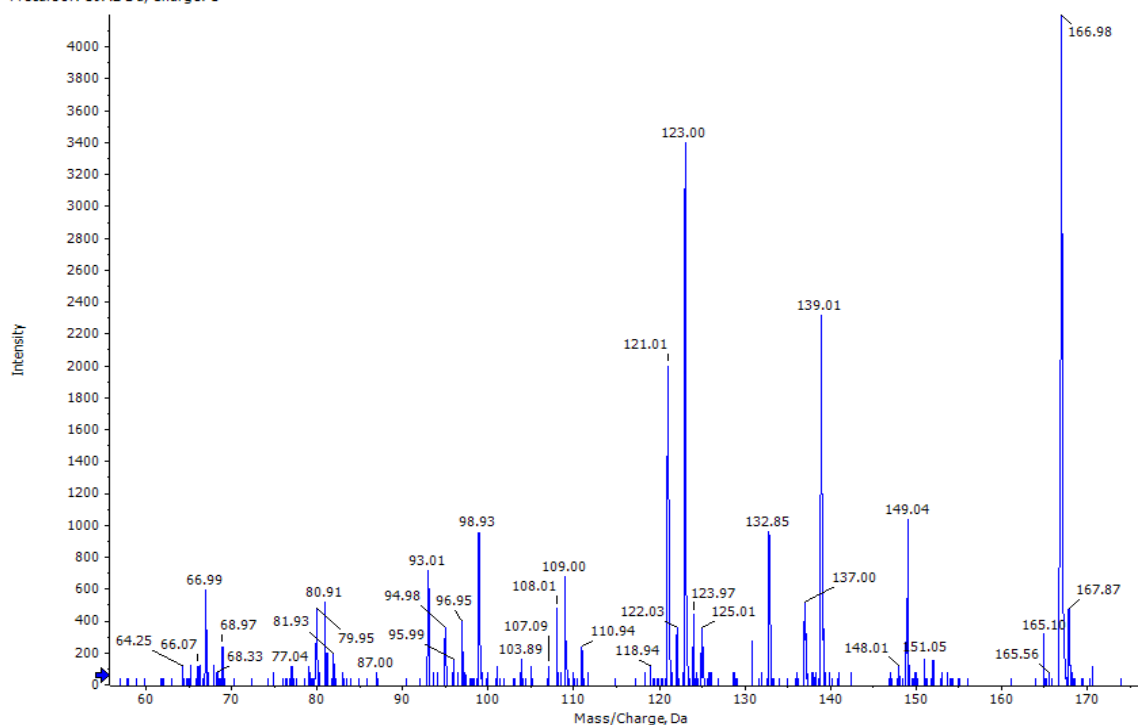

**Figure S2.** MS<sup>2</sup> mass chromatogram of Cyclo-Ala-Pro-Diketopiperazine.

Spectrum from AT -ve 1-6-2022 .wiff (sample 1) - AT -ve, Experiment 2, -EPI (50 - 800) from 12.432 min  
Precursor: 233.4 Da, Charge: 2

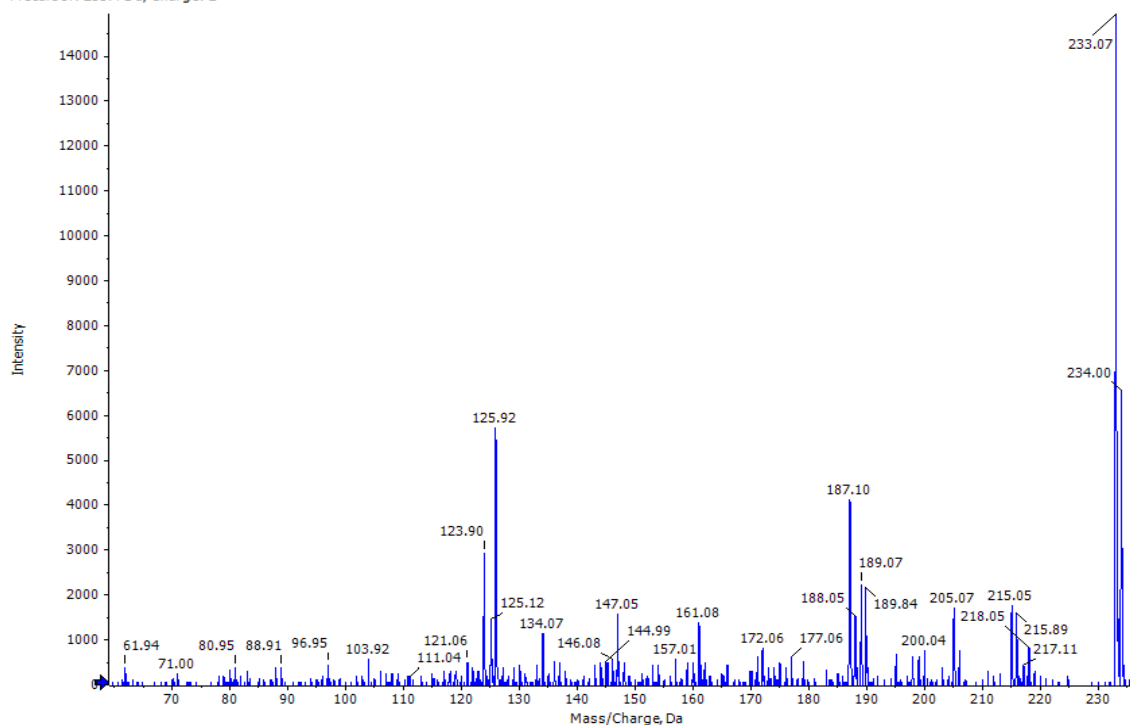

**Figure S3.** MS<sup>2</sup> mass chromatogram of (S)-alternariphent A.

Spectrum from AT -ve 1-6-2022 .wiff (sample 1) - AT -ve, Experiment 2, -EPI (50 - 800) from 12.837 min  
Precursor: 161.4 Da

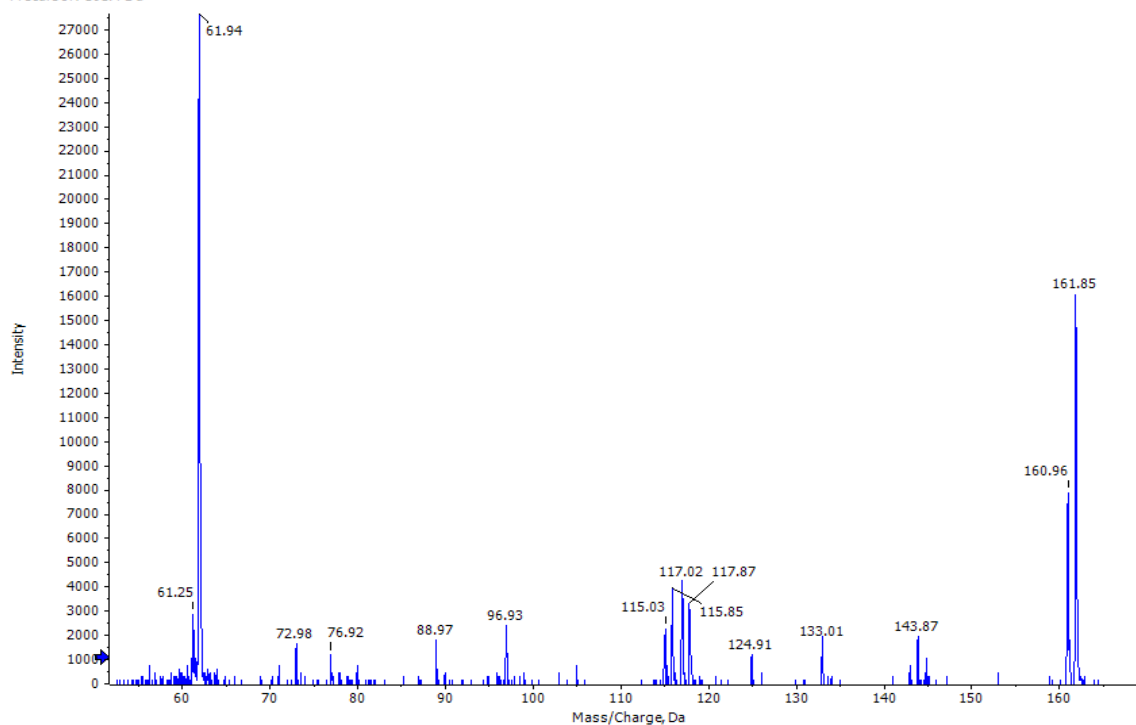

**Figure S4.** MS<sup>2</sup> mass chromatogram of Alternapyran.

Spectrum from AT -ve 1-6-2022 .wiff (sample 1) - AT -ve, Experiment 2, -EPI (50 - 800) from 14.321 min  
Precursor: 291.4 Da, Charge: 1

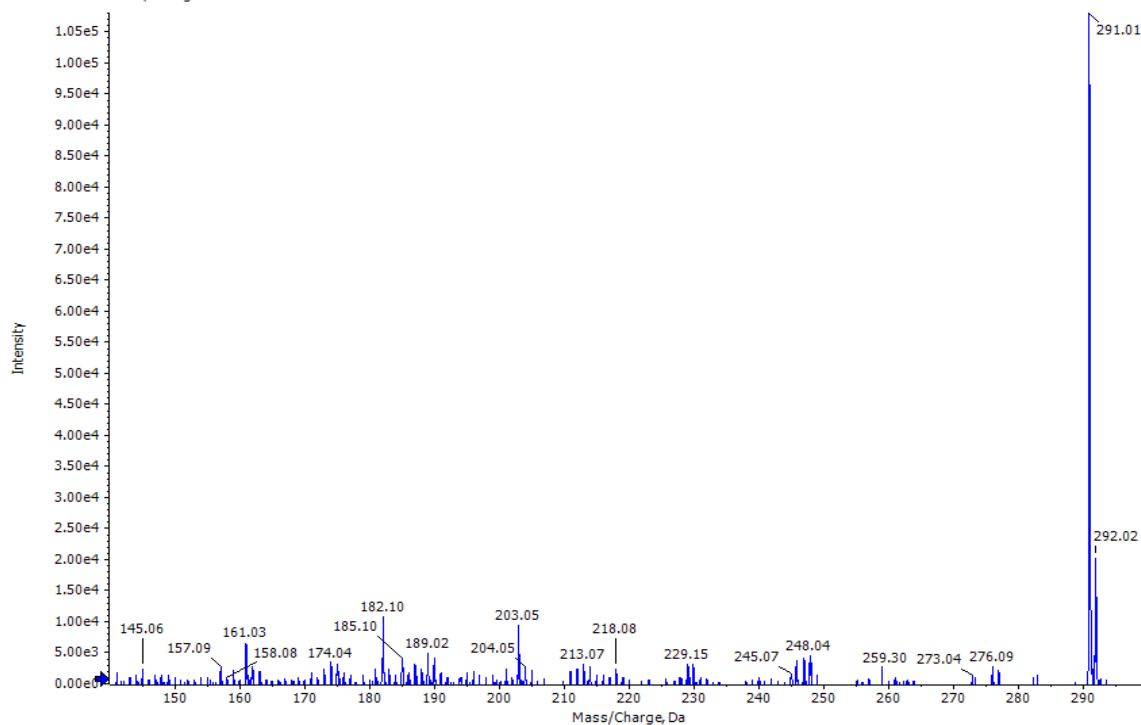

**Figure S5.** MS<sup>2</sup> mass chromatogram of Altenuene (4'-Epialtenuene).

Spectrum from AT -ve 1-6-2022 .wiff (sample 1) - AT -ve, Experiment 2, -EPI (50 - 800) from 14.713 min  
Precursor: 286.4 Da, Charge: 1

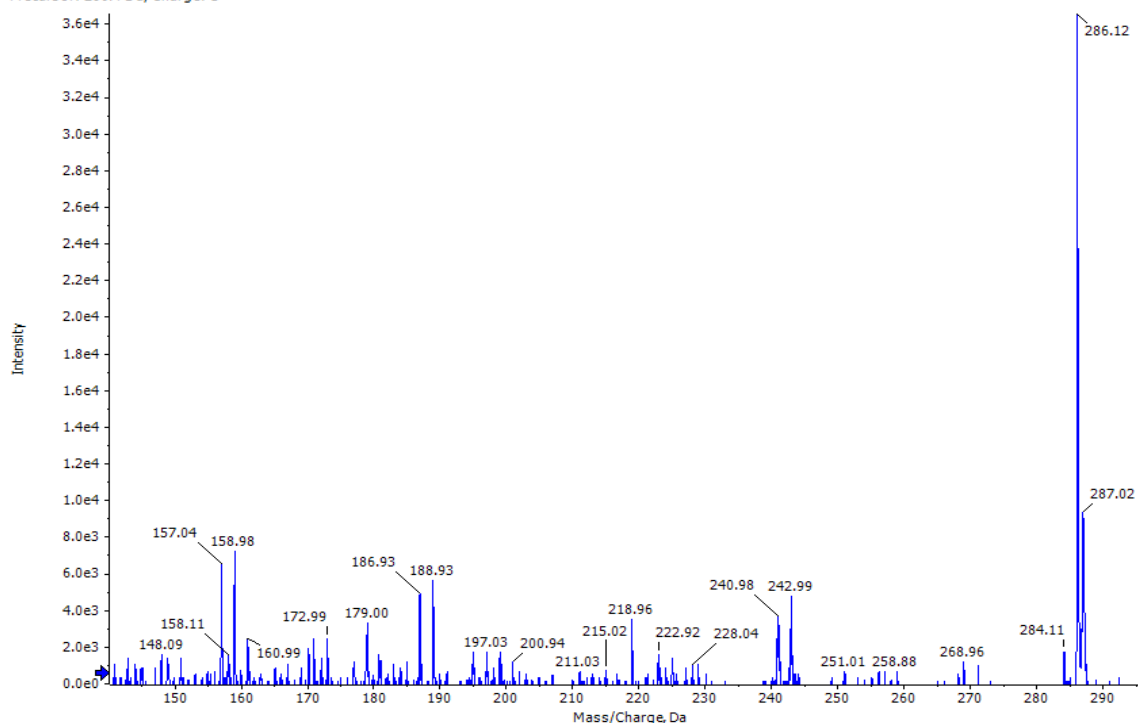

**Figure S6.** MS<sup>2</sup> mass chromatogram of Solanapyrone G.

Spectrum from AT -ve 1-6-2022 .wiff (sample 1) - AT -ve, Experiment 2, -EPI (50 - 800) from 15.037 min  
Precursor: 209.7 Da

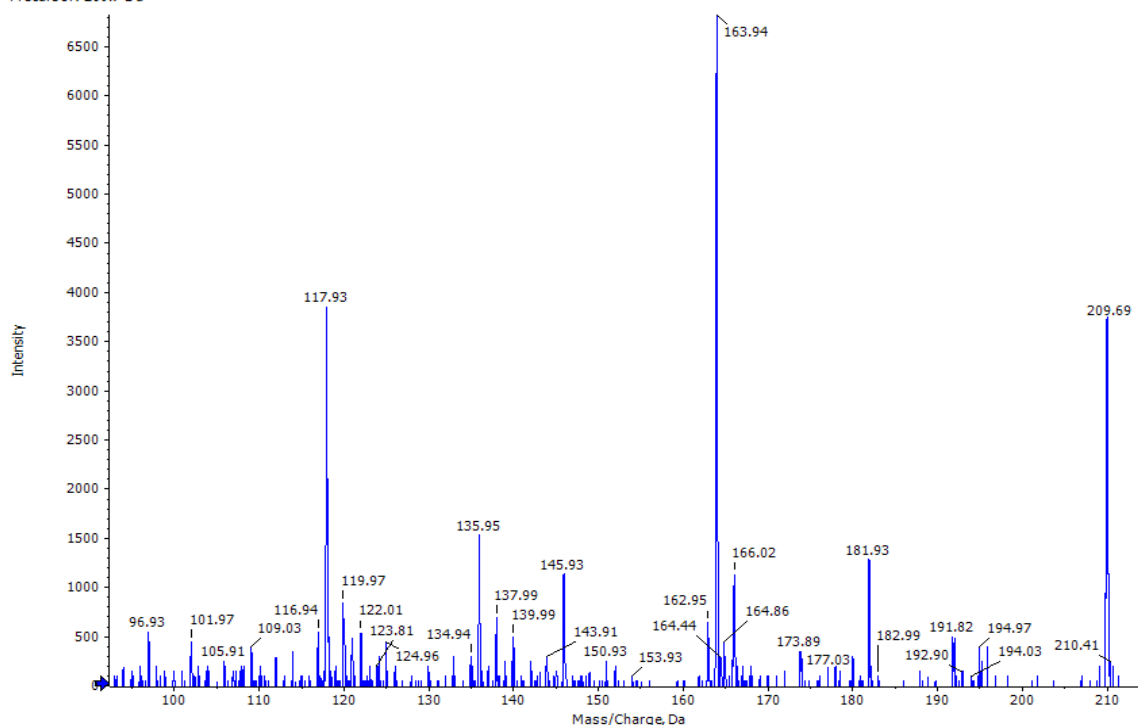

**Figure S7.** MS<sup>2</sup> mass chromatogram of 4-methoxy-6-methyl-5-(3-oxobutyl)-2H-pyran-2-one.

Spectrum from AT +ve 1-6-2022 .wiff (sample 1) - AT +ve, Experiment 2, +EPI (50 - 800) from 15.825 min  
Precursor: 180.4 Da, CE: 35.0

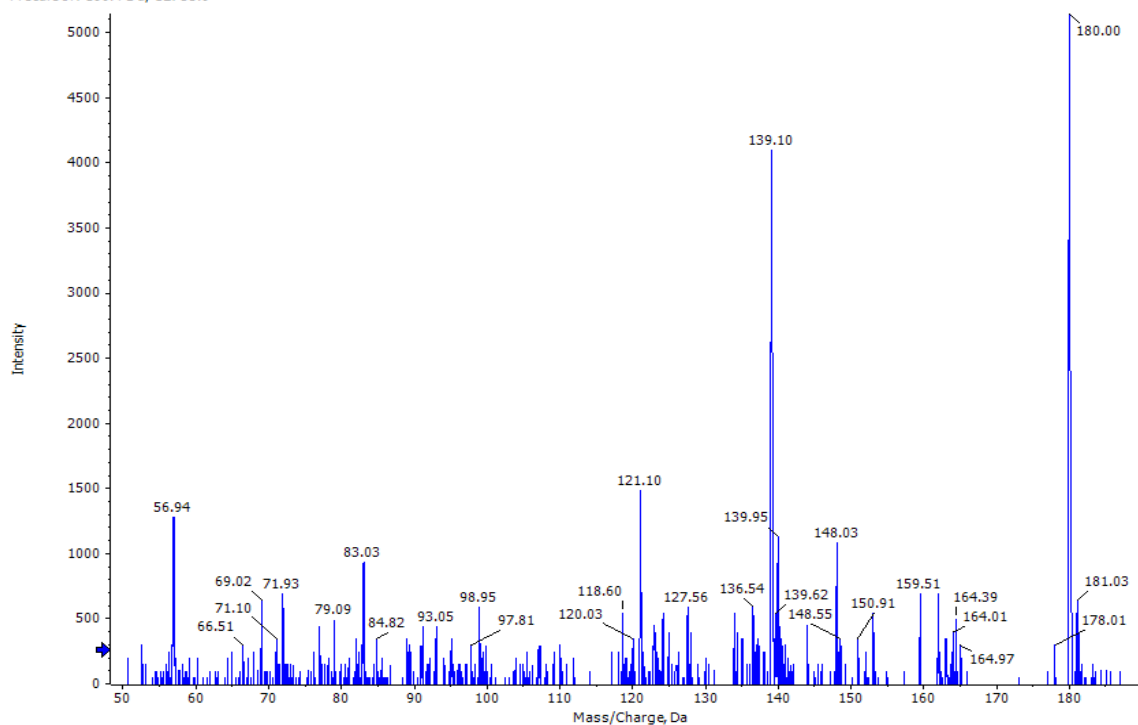

**Figure S8.** MS<sup>2</sup> mass chromatogram of Nacetyltyramine.

Spectrum from AT -ve 1-6-2022 .wiff (sample 1) - AT -ve, Experiment 2, -EPI (50 - 800) from 16.036 min  
Precursor: 196.0 Da

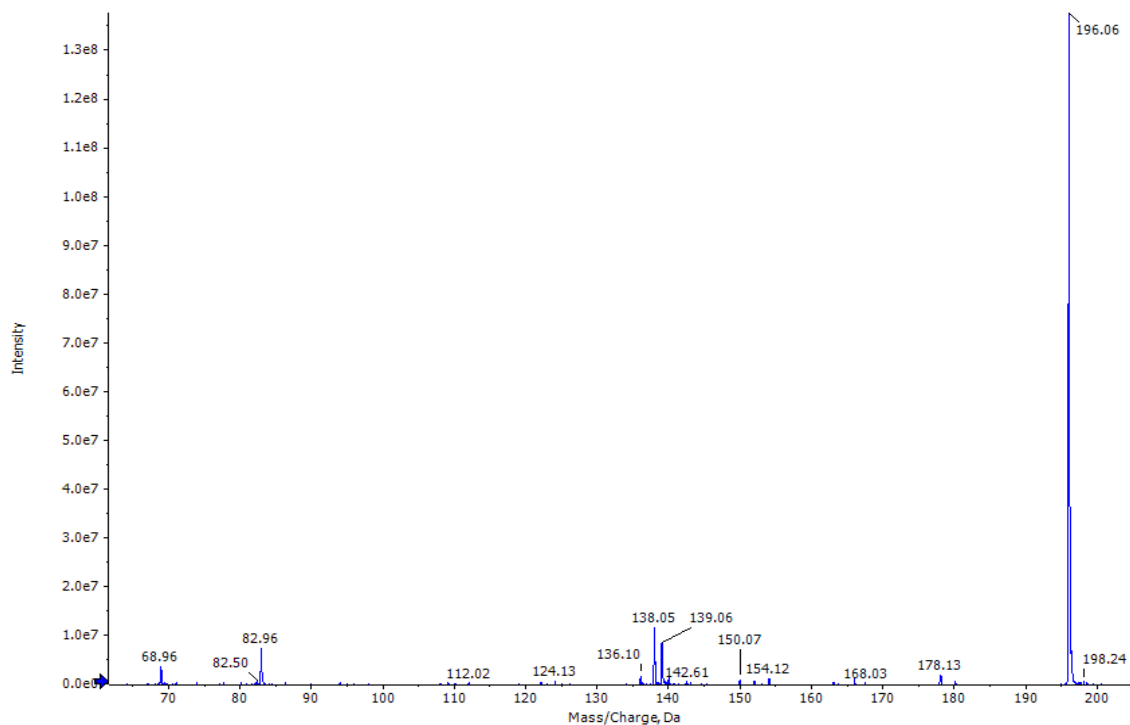

**Figure S9.** MS<sup>2</sup> mass chromatogram of Versimide.

Spectrum from AT +ve 1-6-2022 .wiff (sample 1) - AT +ve, Experiment 2, +EPI (50 - 800) from 16.207 min  
Precursor: 279.4 Da, Charge: 1, CE: 35.0

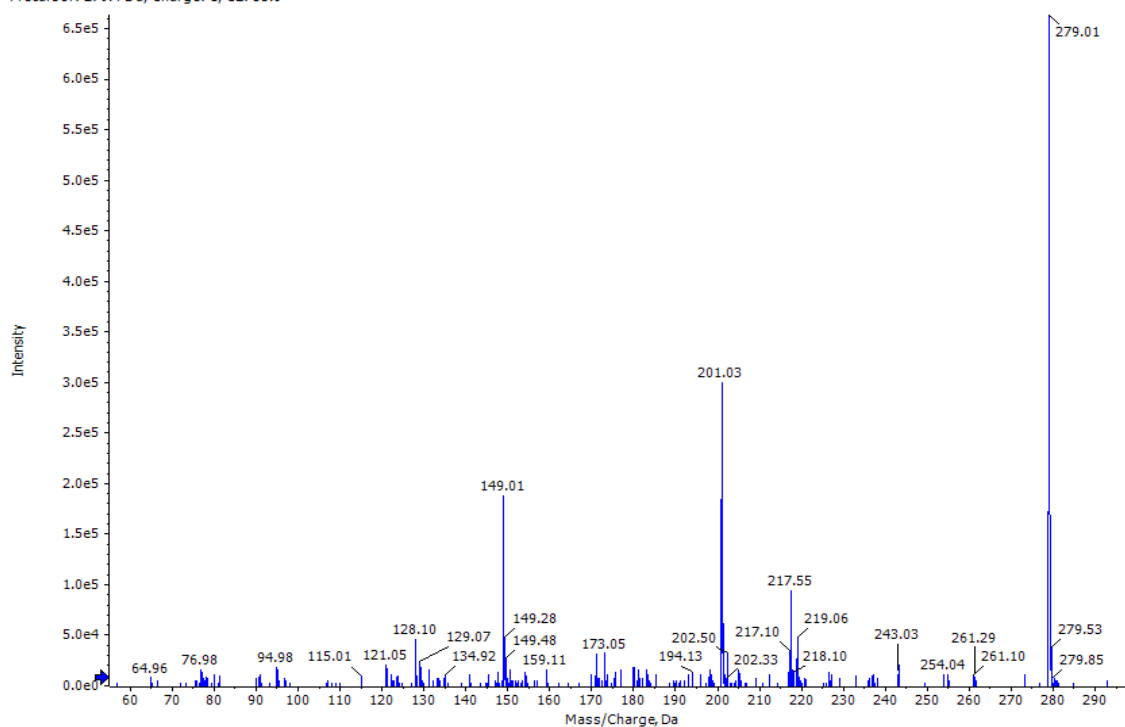

**Figure S10.** MS<sup>2</sup> mass chromatogram of 7-dehydrobrefeldin A.

Spectrum from AT -ve 1-6-2022 .wiff (sample 1) - AT -ve, Experiment 2, -EPI (50 - 800) from 16.843 min  
Precursor: 257.5 Da, Charge: 1

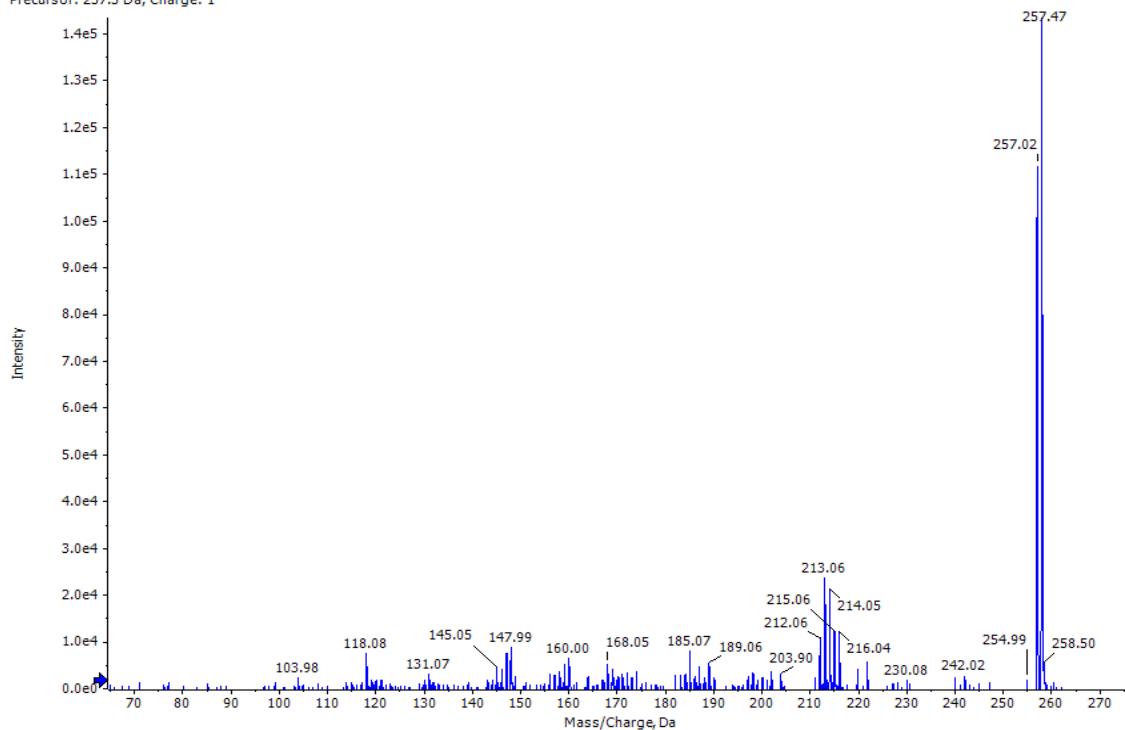

**Figure S11.** MS<sup>2</sup> mass chromatogram of Alternariol.



Spectrum from AT +ve 1-6-2022 .wiff (sample 1) - AT +ve, Experiment 2, +EPI (50 - 800) from 17.214 min  
Precursor: 197.8 Da, CE: 35.0

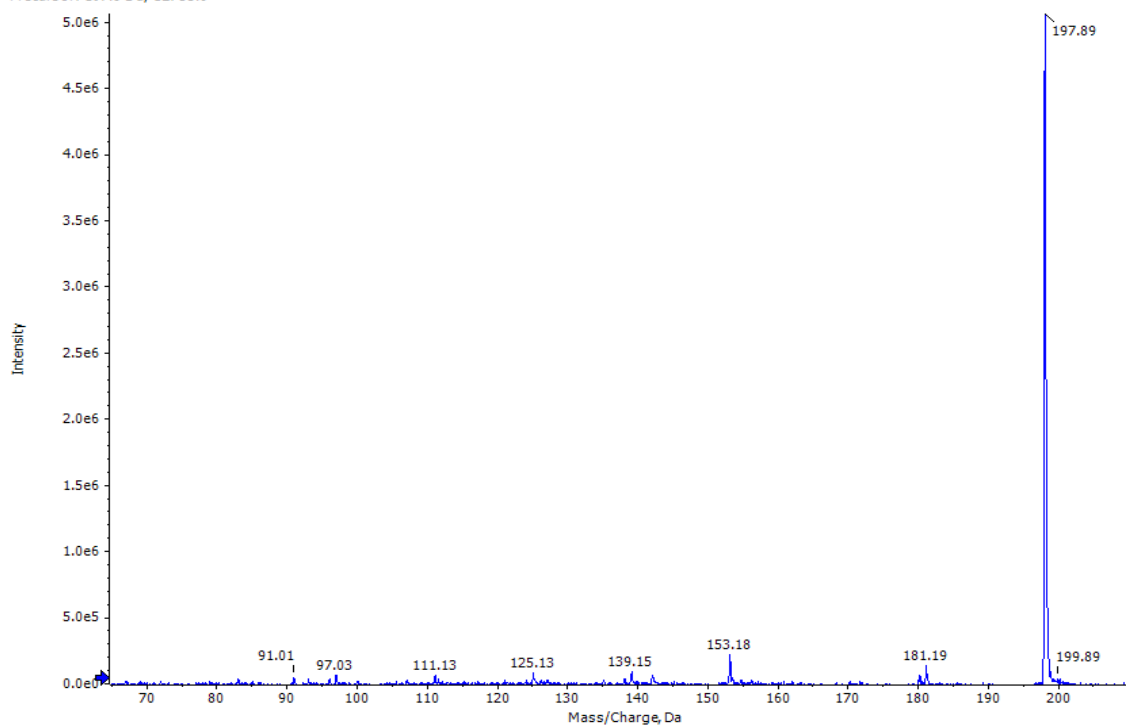

**Figure S12.** MS<sup>2</sup> mass chromatogram of 5-butyl-4-methoxy-6-methyl-2H-pyran-2-one.

Spectrum from AT +ve 1-6-2022 .wiff (sample 1) - AT +ve, Experiment 2, +EPI (50 - 800) from 18.035 min  
Precursor: 275.3 Da, Charge: 1, CE: 35.0

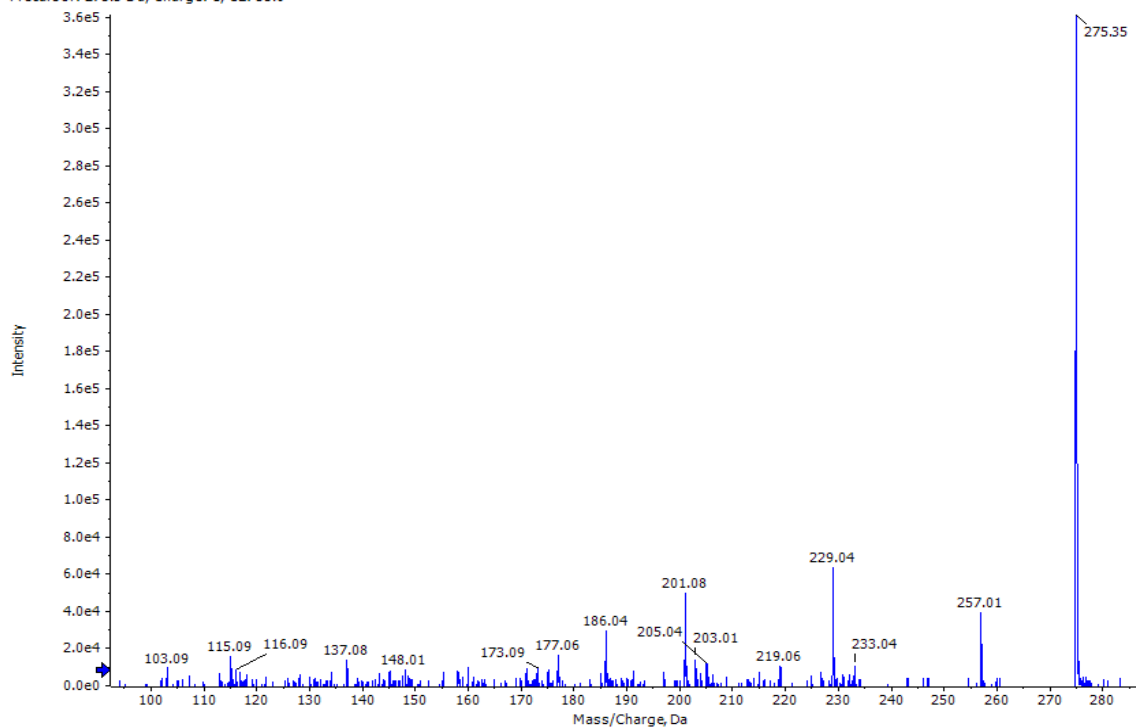

**Figure S13.** MS<sup>2</sup> mass chromatogram of Alvertenuol.

Spectrum from AT -ve 1-6-2022 .wiff (sample 1) - AT -ve, Experiment 2, -EPI (50 - 800) from 18.084 min  
Precursor: 259.2 Da, Charge: 1

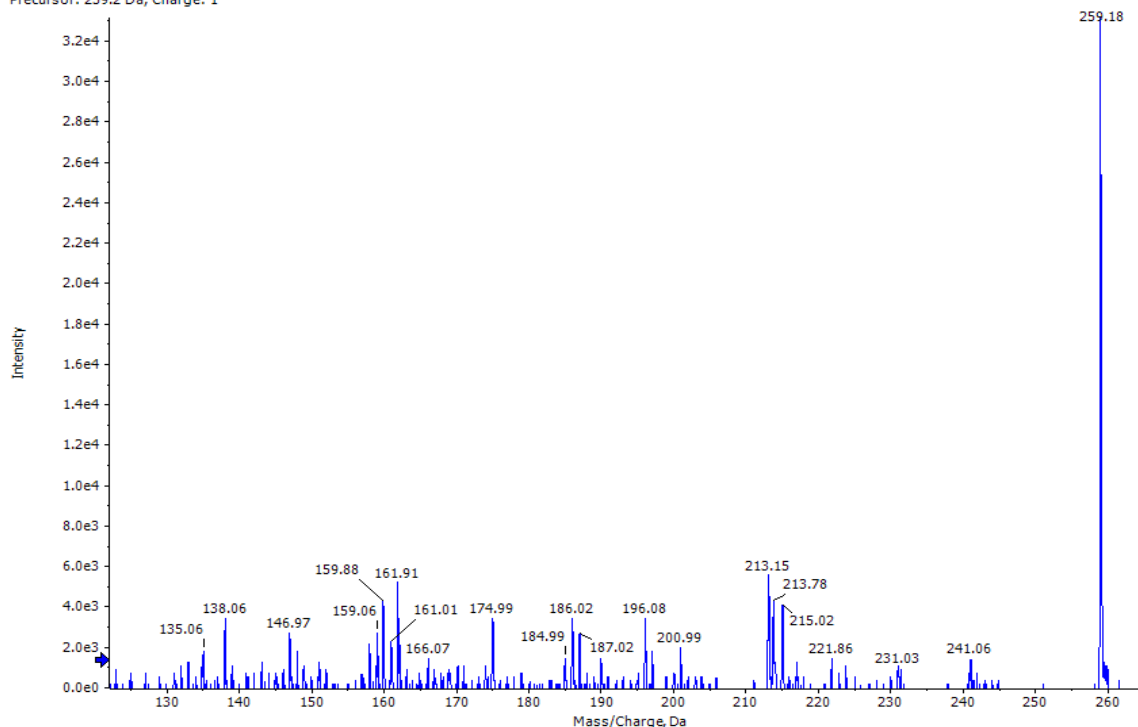

**Figure S14.** MS<sup>2</sup> mass chromatogram of 3-O-demethylaltenuisol.

Spectrum from AT -ve 1-6-2022 .wiff (sample 1) - AT -ve, Experiment 2, -EPI (50 - 800) from 18.845 min  
Precursor: 258.8 Da

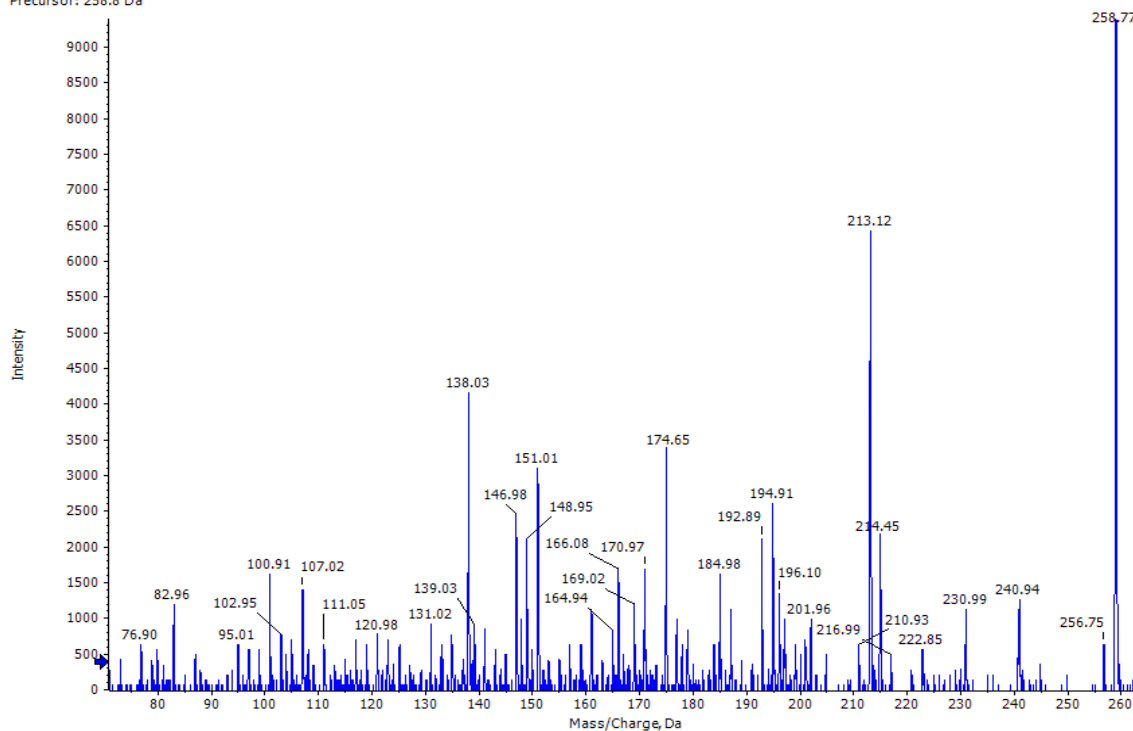

**Figure S15.** MS<sup>2</sup> mass chromatogram of (-)-alternarlactam.

Spectrum from AT +ve 1-6-2022 .wiff (sample 1) - AT +ve, Experiment 2, +EPI (50 - 800) from 19.770 min  
Precursor: 184.1 Da, Charge: 1, CE: 35.0

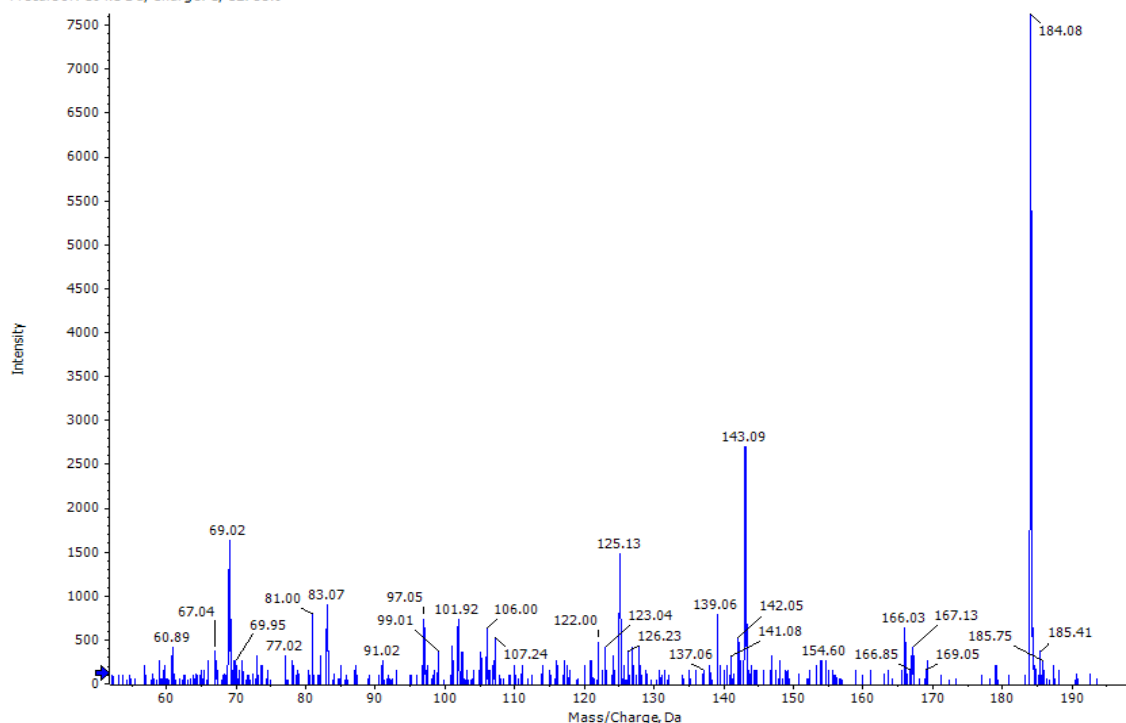

**Figure S16.** MS<sup>2</sup> mass chromatogram of 2-(N-vinylacetamide)-4-hydroxymethyl-3-enebutyrolactone.

Spectrum from AT -ve 1-6-2022 .wiff (sample 1) - AT -ve, Experiment 2, -EPI (50 - 800) from 25.337 min  
Precursor: 271.6 Da

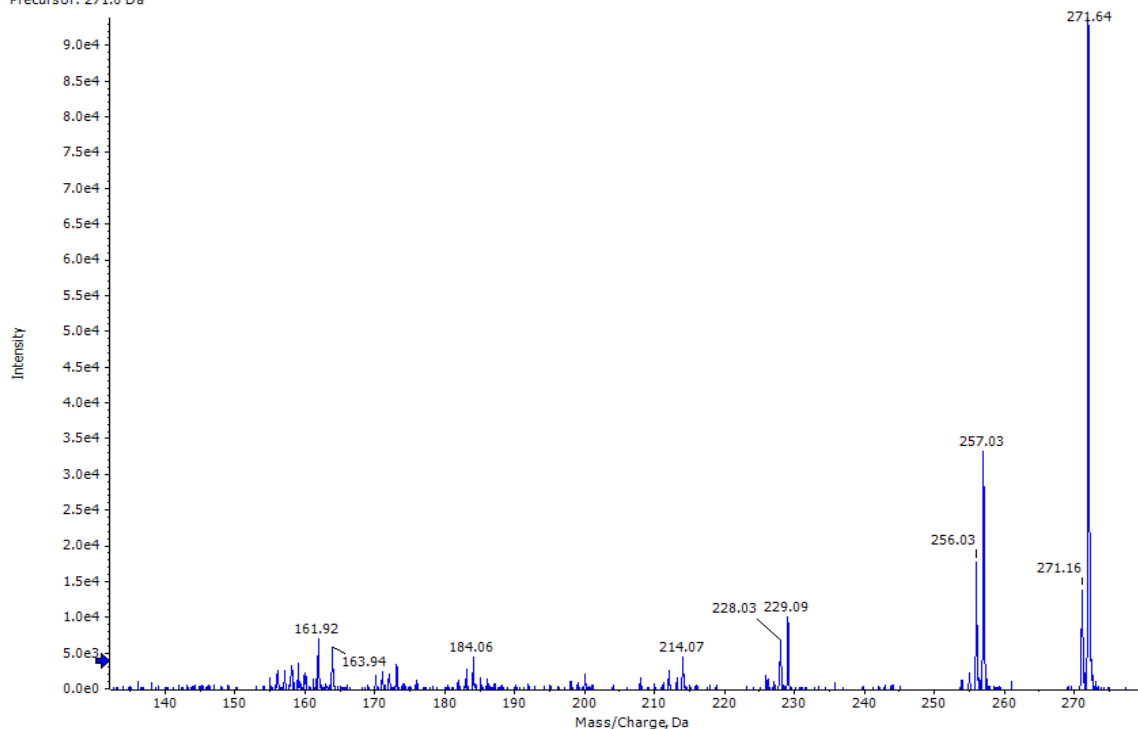

**Figure S17.** MS<sup>2</sup> mass chromatogram of Alternariol-9-methyl ether.

Spectrum from AT -ve 1-6-2022 .wiff (sample 1) - AT -ve, Experiment 2, -EPI (50 - 800) from 30.177 min  
Precursor: 255.7 Da  
With 1 other merged spectrum

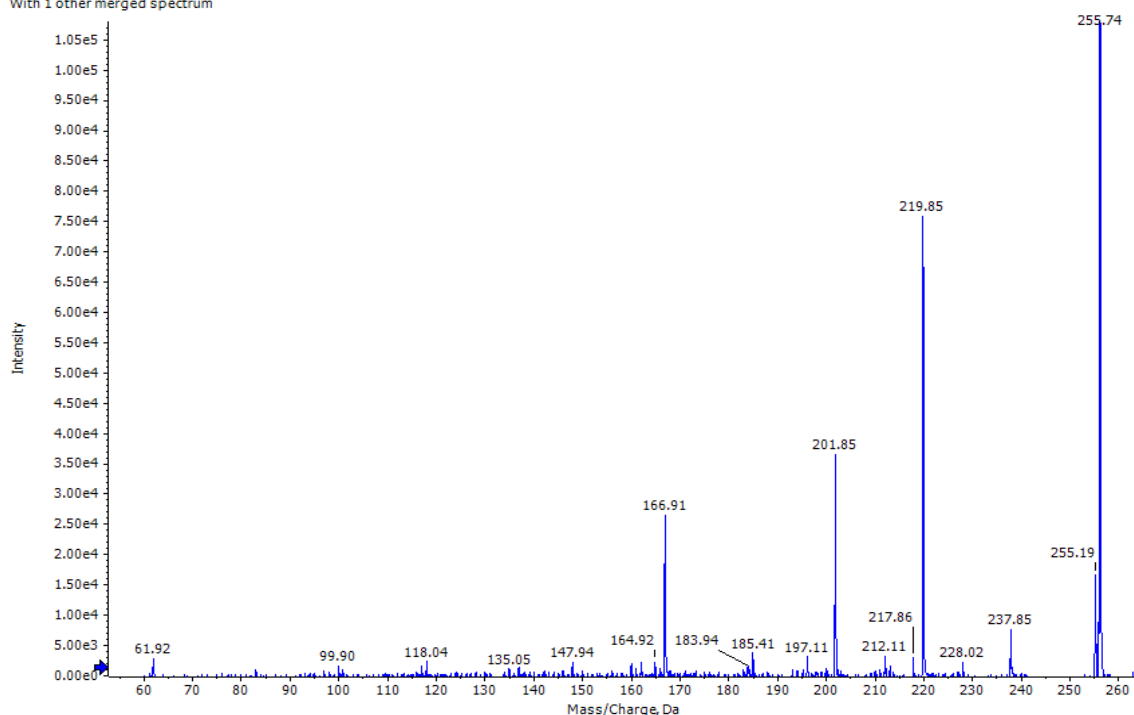

**Figure S18.** MS<sup>2</sup> mass chromatogram of Resveratroldehyde C.

Spectrum from AT +ve 1-6-2022 .wiff (sample 1) - AT +ve, Experiment 2, +EPI (50 - 800) from 30.235 min  
Precursor: 263.4 Da, Charge: 1, CE: 35.0

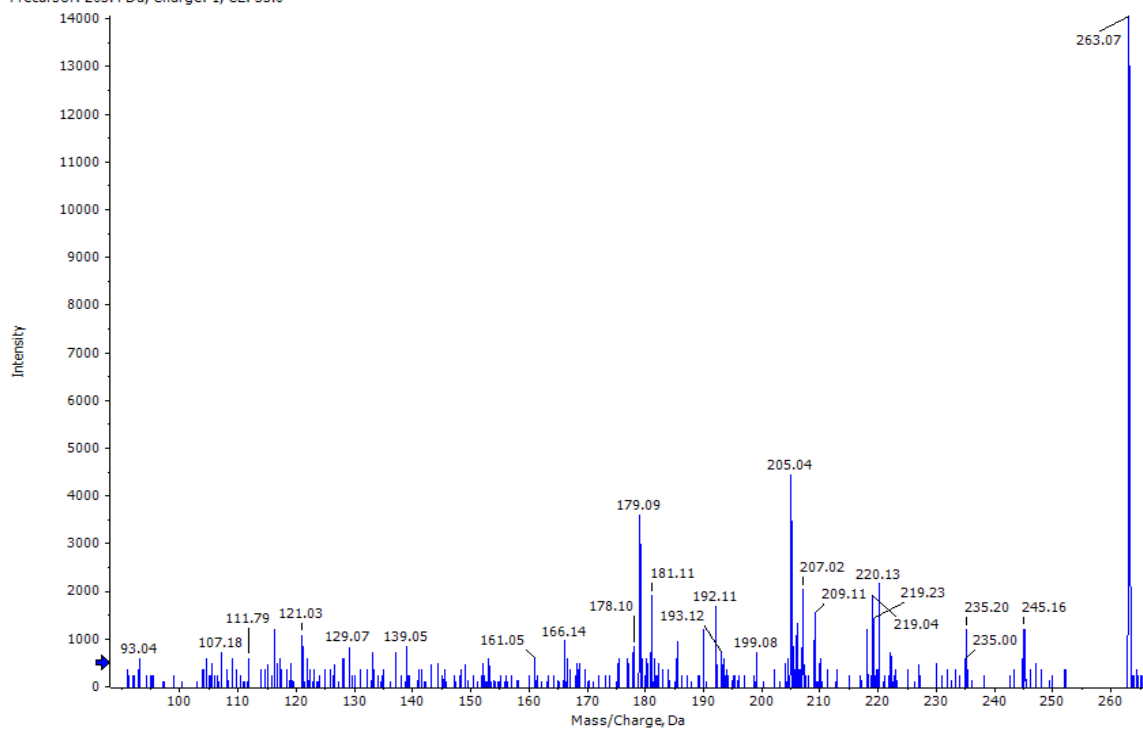

**Figure S19.** MS<sup>2</sup> mass chromatogram of Solanapyrone P.

Spectrum from AT -ve 1-6-2022 .wiff (sample 1) - AT -ve, Experiment 2, -EPI (50 - 800) from 31.128 min  
Precursor: 265.8 Da, Charge: 1

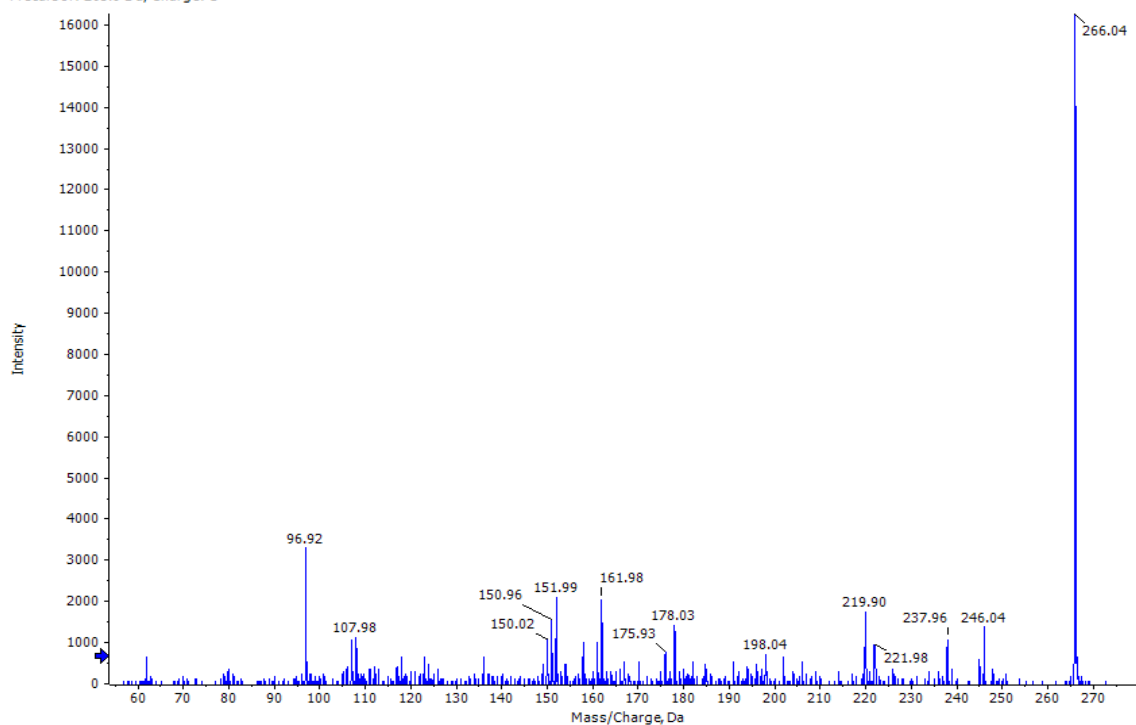

**Figure S20.** MS<sup>2</sup> mass chromatogram of Atransfusarin.

Spectrum from AT +ve 1-6-2022 .wiff (sample 1) - AT +ve, Experiment 2, +EPI (50 - 800) from 32.173 min  
Precursor: 281.6 Da, Charge: 3, CE: 35.0

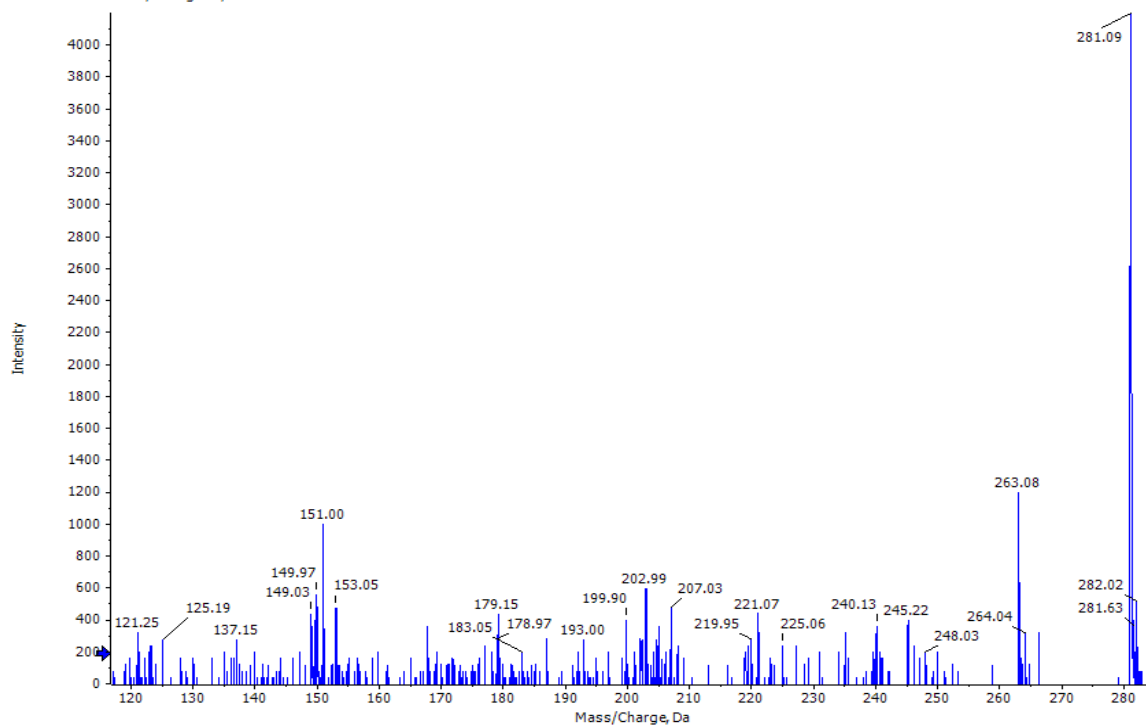

**Figure S21.** MS<sup>2</sup> mass chromatogram of Alternatain A.
